# Supplementary material
Source: publisher site journal article supplement (https://www.spandidos-publications.com/1615/downloadSupplementary)

Figure S1. Purity analysis of the four tested compounds by HPLC-UV (210 nm).

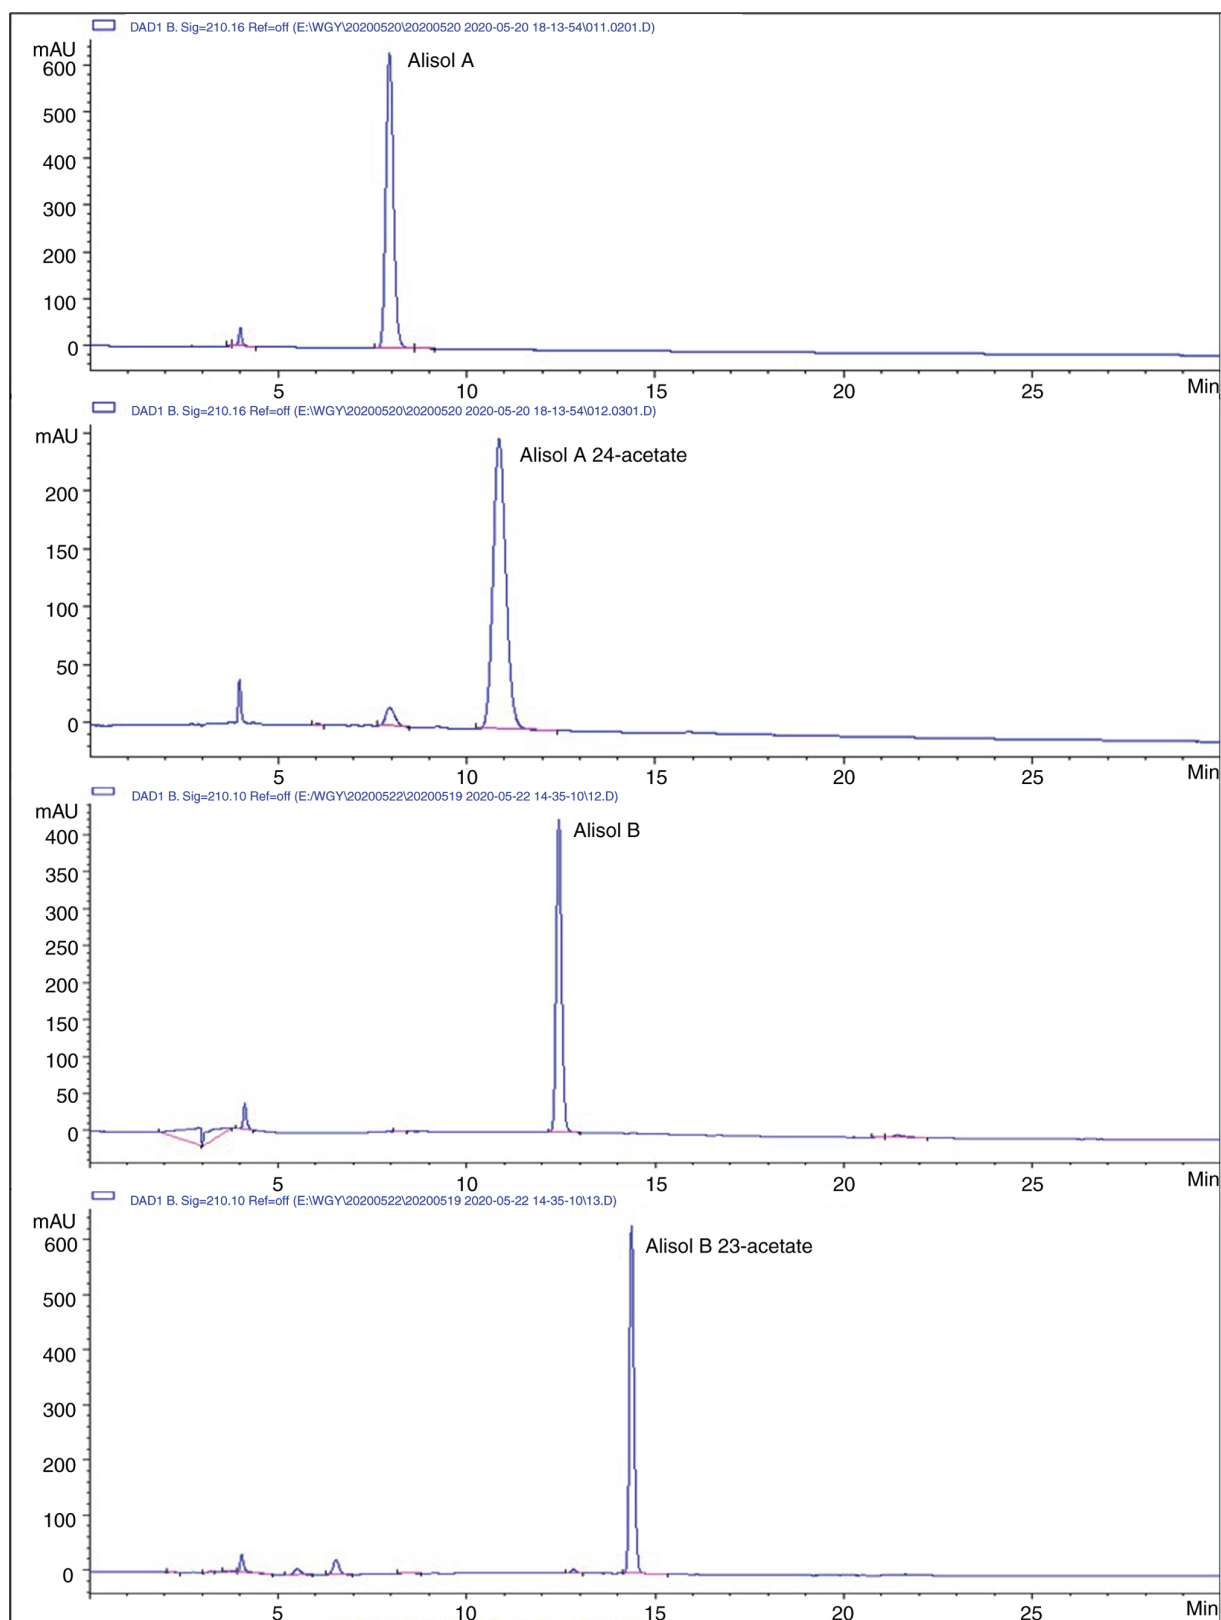

Figure S2. Alisol A decreases the cell viability of primary human breast cancer cells. Cells were treated with 10 or 20  $\mu\text{M}$  alisol A, and the cell viability was assessed using a real-time cell proliferation assay.

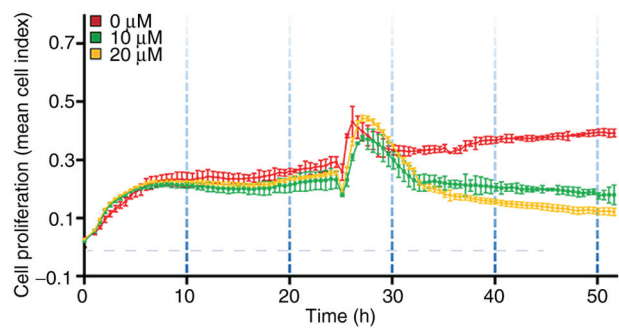

Supplement: Supplementary file 1 [file downloadSupplementary]
